# Supplementary material for: Epithelial β1 integrin is required for lung branching morphogenesis and alveolarization
Source: Oxford University Press journal article supplement (doi:10.1242/dev.117200), 2014-11-14
Supplement: dev117200supp.pdf [file dev117200supp.pdf]

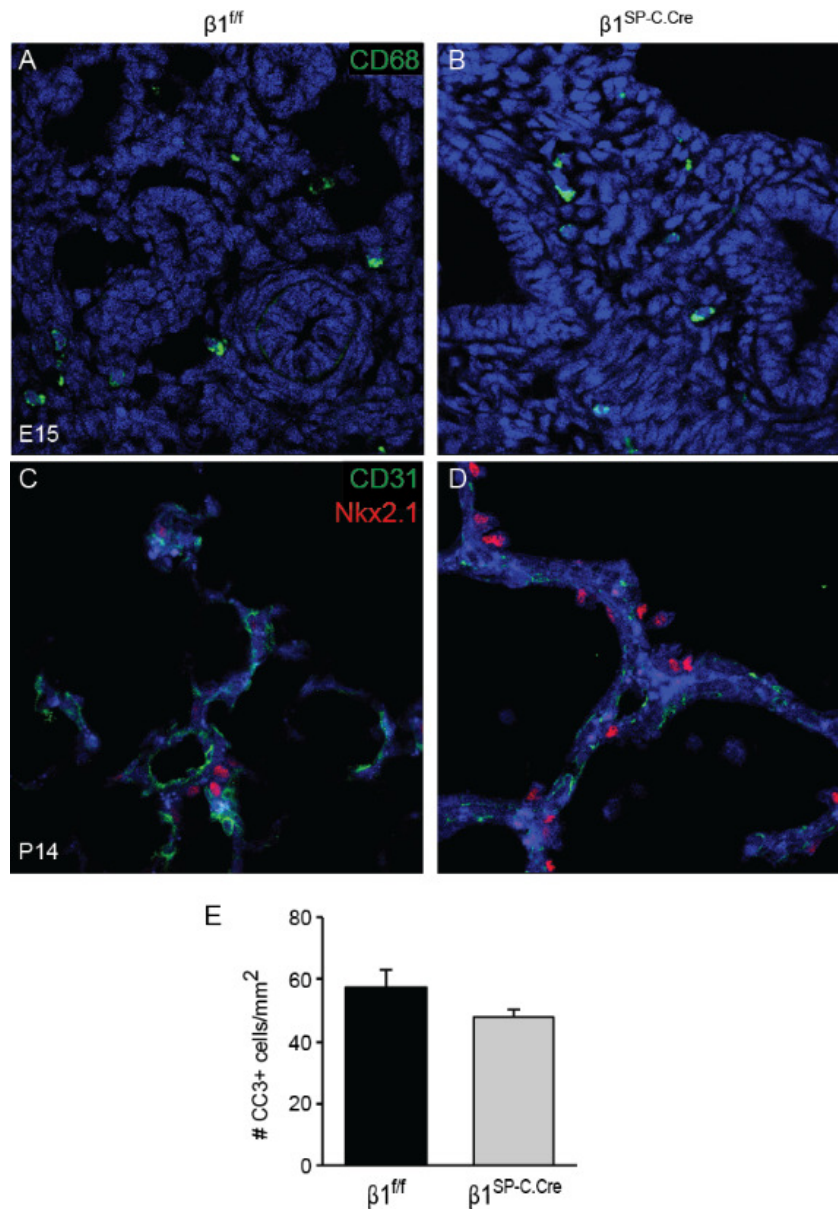

**Supplemental Figure 1**

**Supplemental Figure 1. Epithelial  $\beta 1$  integrin deletion results in increased macrophage accumulation after E15 and retains an intact capillary network at P14.** (A, B) E15 frozen sections immunostained for CD68 (green) show similar numbers of macrophages present in control (A) and  $\beta 1^{SP-C.Cre}$  (B) lungs. (C, D) P14 frozen sections immunostained for the vascular marker CD31 (green) and Nkx2.1 (red) demonstrate an intact capillary network in close proximity to the alveolar surface in both control (C) and  $\beta 1^{SP-C.Cre}$  (D) lungs. (E) The number of cleaved caspase-3 (CC3) + cells/mm<sup>2</sup> is not significantly different between E18  $\beta 1^{SP-C.Cre}$  and  $\beta 1^{f/f}$  lungs.
